# Supplementary material for: Inflammation induced by incomplete radiofrequency ablation accelerates tumor progression and hinders PD-1 immunotherapy
Source: PubMed Central journal article supplement (PMC6883042; doi:10.1038/s41467-019-13204-3), 2019-11-28
Supplement: 41467_2019_13204_MOESM1_ESM.pdf [file 41467_2019_13204_MOESM1_ESM.pdf]

## **Supplementary Information**

### **Inflammation induced by incomplete radiofrequency ablation accelerates tumor progression and hinders PD-1 immunotherapy**

Shi et al.

**Supplementary Table 1.** Baseline of characteristics

| Characteristics          | Group A (n=43) | Group B (n=43) | <i>P</i> value |
|--------------------------|----------------|----------------|----------------|
| Age (year)               |                |                | 0.675          |
| Median,                  | 62             | 61             |                |
| Range                    | 32-78          | 39-78          |                |
| Gender                   |                |                | 1.000          |
| Male                     | 26             | 26             |                |
| Female                   | 17             | 17             |                |
| Performance status       |                |                | 0.661          |
| 0                        | 24             | 26             |                |
| 1                        | 19             | 17             |                |
| Site of primary cancer   |                |                | 0.784          |
| Right colon              | 15             | 18             |                |
| Left/sigmon colon        | 12             | 10             |                |
| Rectum                   | 16             | 15             |                |
| Time to liver metastases |                |                | 0.805          |
| Synchronous              | 12             | 10             |                |
| Metachronous             | 31             | 33             |                |
| Time size                |                |                | 0.067          |
| ≤3 cm                    | 19             | 10             |                |
| >3 cm                    | 24             | 33             |                |
| Number of lesions        |                |                | 0.910          |
| 1                        | 21             | 19             |                |
| 2–3                      | 13             | 14             |                |
| 3–5                      | 9              | 10             |                |
| Extrahepatic metastases  |                |                | 0.757          |
| With                     | 5              | 7              |                |
| Without                  | 38             | 36             |                |
| Baseline of CEA          |                |                | 0.666          |
| ≤200 ng/mL               | 22             | 19             |                |
| >200 ng/mL               | 21             | 24             |                |

Abbreviations: CEA, carcinoembryonic antigen

**Supplementary Table 2.** Adverse tumor factors affecting RFA operation in patients with local residual tumor

| Factors                                | n  |
|----------------------------------------|----|
| Tumor size>3cm                         | 14 |
| Contacting with portal vein            | 14 |
| Contacting with hepatic hilum          | 10 |
| Adjacent to the gastrointestinal tract | 6  |
| Adjacent to the gallbladder            | 2  |

Three patient had tumor with 3 adverse factors.

**Supplementary Table 3.** Multivariate analysis of prognostic factors for time to new metastasis and survival after RFA

| Factors                  | TTNM  |       |                | OS    |       |                |
|--------------------------|-------|-------|----------------|-------|-------|----------------|
|                          | B     | SE    | <i>P</i> value | B     | SE    | <i>P</i> value |
| Site of primary cancer   | 0.071 | 0.135 | 0.600          | 0.025 | 0.145 | 0.864          |
| CEA                      | 0.171 | 0.130 | 0.187          | 0.143 | 0.133 | 0.280          |
| Time to liver metastases | 0.473 | 0.244 | 0.075          | 0.346 | 0.287 | 0.228          |
| Number of lesions        | 0.191 | 0.155 | 0.218          | 0.418 | 0.161 | 0.010          |
| Tumor size               | 0.612 | 0.244 | 0.012          | 0.764 | 0.252 | 0.002          |
| Incomplete ablation      | 1.118 | 0.262 | <0.001         | 1.205 | 0.273 | <0.001         |

Source data are provided as a Source Data file.

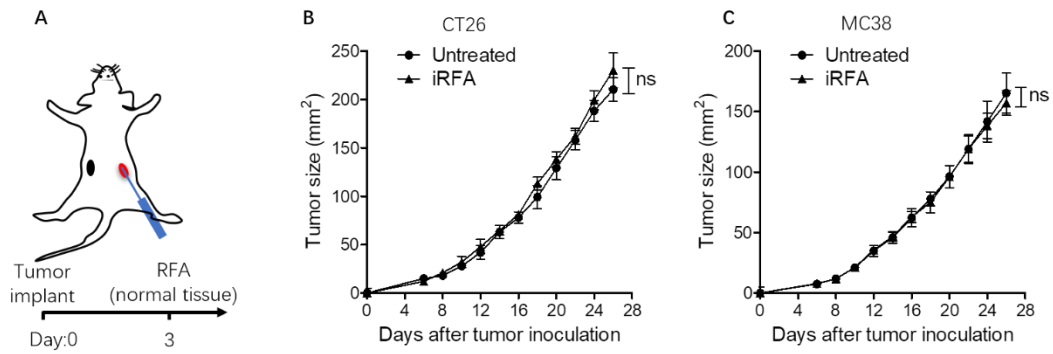

**Supplementary Figure 1.** Thermal injury in normal tissue caused by RFA does not lead to tumor progression. **A.** Schematic of the study. CT26 cells were injected *i.d.* into male Balb/c on the left flank. RFA was performed to cause thermal injury in normal tissue at the right flank (n=5). **B.** Growth curve of the tumor at the left flank (n=5). Each error bar represents means  $\pm$  SEM, One-sided ANOVA test, ns present not significant. Source data are provided as a Source Data file.

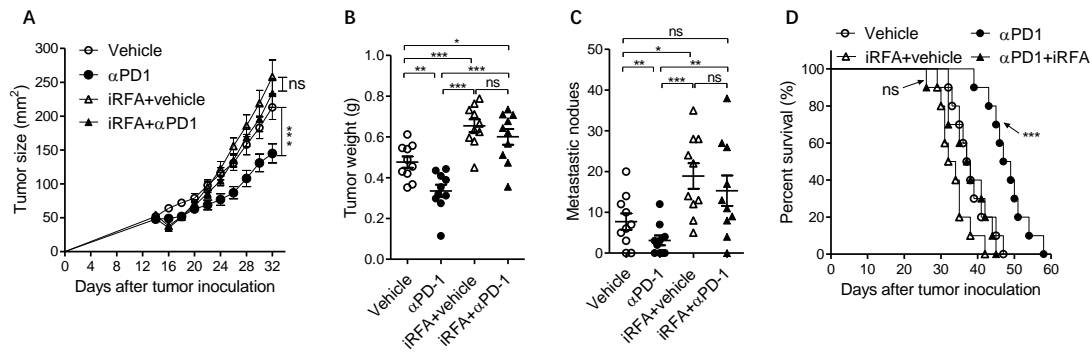

**Supplementary Figure 2.** iRFA promotes tumor progression and hinders the effect of anti-PD-1 therapy in Hepa1-6 hepatic cancer mouse model. Hepa1-26 model treated with iRFA and anti-PD-1 mAb as described in Fig 2F. **A.** Growth curve of the residual tumor (n=10). **B.** Weight of the residual tumor examined on day 14 after iRFA by dissection the mice (n=10). **C.** Number of the metastasis examined on day 14 after iRFA by dissection the mice (n=10). **D.** Kaplan-Meier survival curves are shown and the log-rank test was performed (ns: compared to iRFA+vehicle, \*\*\*: compared to the other three groups, n=10). Data represent cumulative results from 1 of 2 independent. The data are represented as mean  $\pm$  SEM. Statistical differences between pairs of groups were determined by a two-tailed Student's t-test (values represent means  $\pm$  SEM, ns present not significant, \* $P$  < 0.05, \*\* $P$  < 0.01, \*\*\* $P$  < 0.001). Source data are provided as a Source Data file.

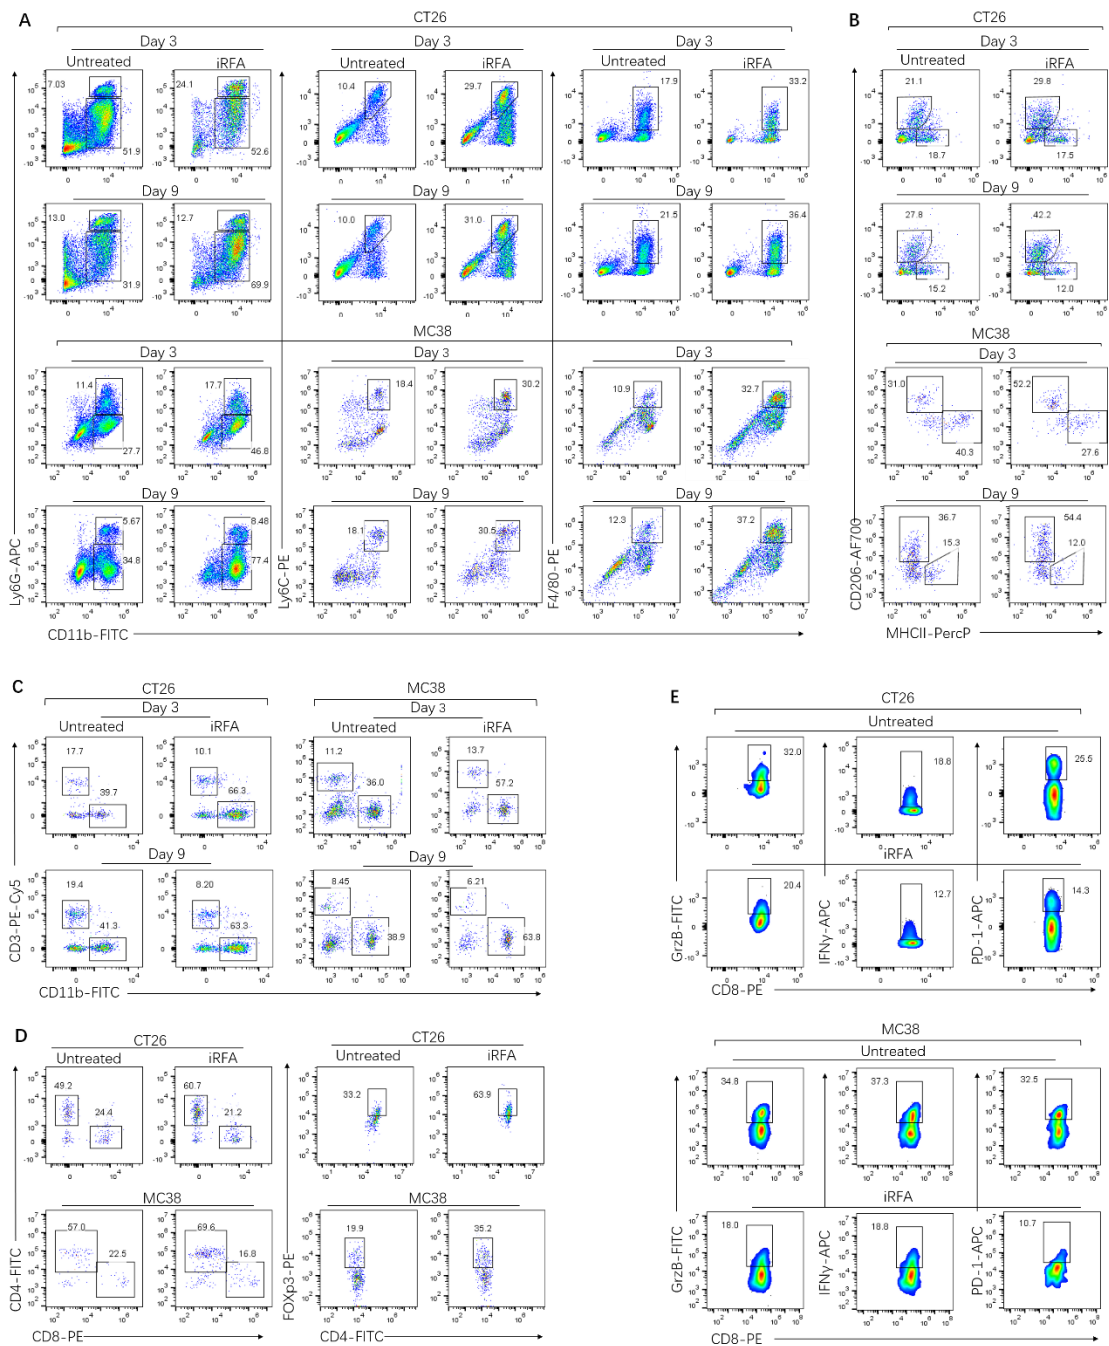

**Supplementary Figure 3. Flow cytometric analysis of myeloid cells infiltration and T response in the residual tumors.** iRFA was administrated in CT26 and MC38-bearing mice as described in Fig. 2A. On days 3 and 9 after iRFA treatment, the residual tumors were resected and either digested to generate single cell suspension or to isolate RNA or embedded in paraffin.

**A.** Representative flow cytometric analysis of CD11b<sup>+</sup>, CD11b<sup>+</sup>Ly6G<sup>+</sup>, CD11b<sup>+</sup>Ly6C<sup>+</sup>, and CD11b<sup>+</sup>F4/80<sup>+</sup> cells (gate on CD45<sup>+</sup> liver cells) in the untreated and iRFA-treated CT26 and MC38 tumors (n=5). **B.** Representative

flow cytometric analysis of CD11b<sup>+</sup>F4/80<sup>+</sup> (TAM) population, and expression of CD206 and MHCII in CD11b<sup>+</sup>F4/80<sup>+</sup> cell populations in the untreated and iRFA-treated CT26 and MC38 tumors (n=5). **C.** Representative flow cytometric analysis of CD11b<sup>+</sup>, CD3<sup>+</sup> cells in the untreated and iRFA-treated CT26 and MC38 tumors on day 3 and day 9 (n=5). **D.** Representative flow cytometric analysis of CD8<sup>+</sup>, CD4<sup>+</sup> and FoxP3<sup>+</sup> cells in the untreated and iRFA-treated CT26 and MC38 tumors on day 3 and day 9 (n=5). **E.** Representative flow cytometric analysis of granzyme B, IFN- $\gamma$  and PD-1 expression in CD8<sup>+</sup> cells in the untreated and iRFA-treated CT26 and MC38 tumors on day 3 and day 9 (n=5).



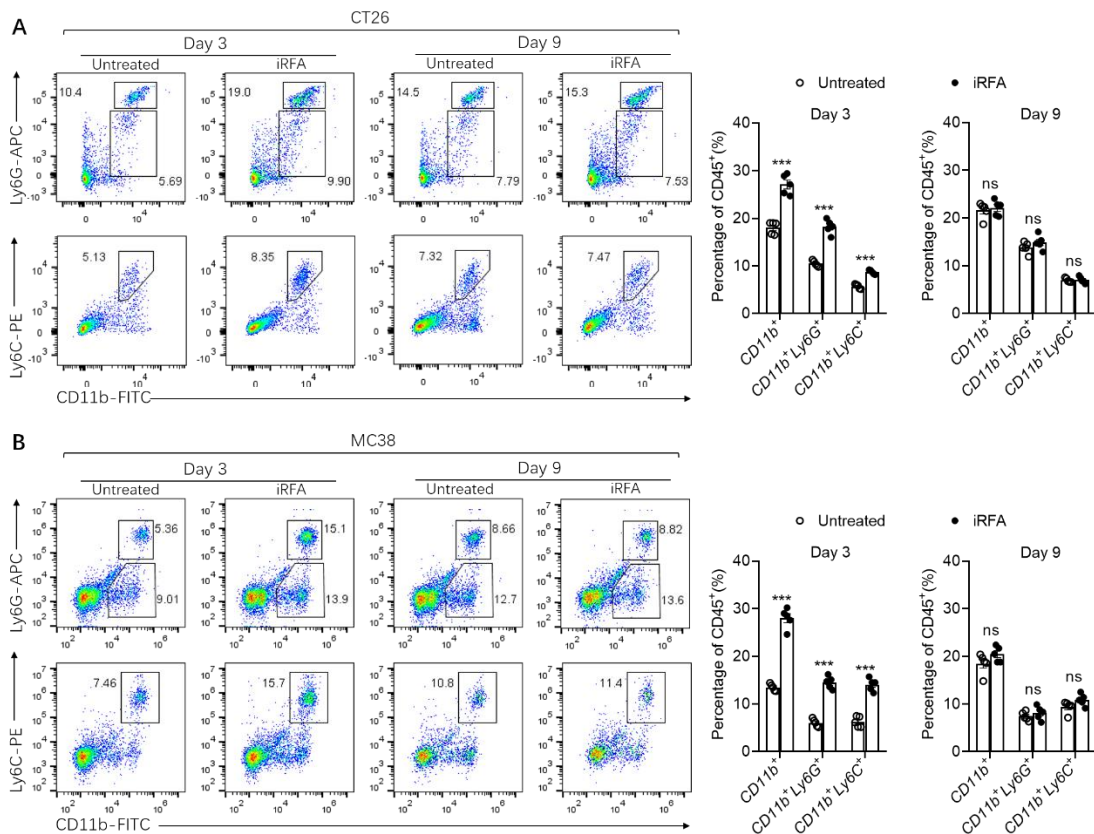

**Supplementary Figure 4.** iRFA induces a transient increase of neutrophils and monocytes in peripheral blood. iRFA was administrated in CT26 and MC38-bearing mice as described in Fig. 2A. **A.** Flow cytometric analysis of CD11b<sup>+</sup>, CD11b<sup>+</sup>Ly6G<sup>+</sup>, and CD11b<sup>+</sup>Ly6C<sup>+</sup> in peripheral blood on days 3 and 9 (n=5). **B.** Percentages of CD11b<sup>+</sup>, CD11b<sup>+</sup>Ly6G<sup>+</sup>, and CD11b<sup>+</sup>Ly6C<sup>+</sup> on days 3 and 9. Data represent results from 1/2 independent experiments (n=5). The data are represented as mean  $\pm$  SEM. Statistical differences between pairs of groups were determined by a two-tailed Student's t-test (values represent mean  $\pm$  SEM, \*\*\* $P$ <0.001). Source data are provided as a Source Data file.

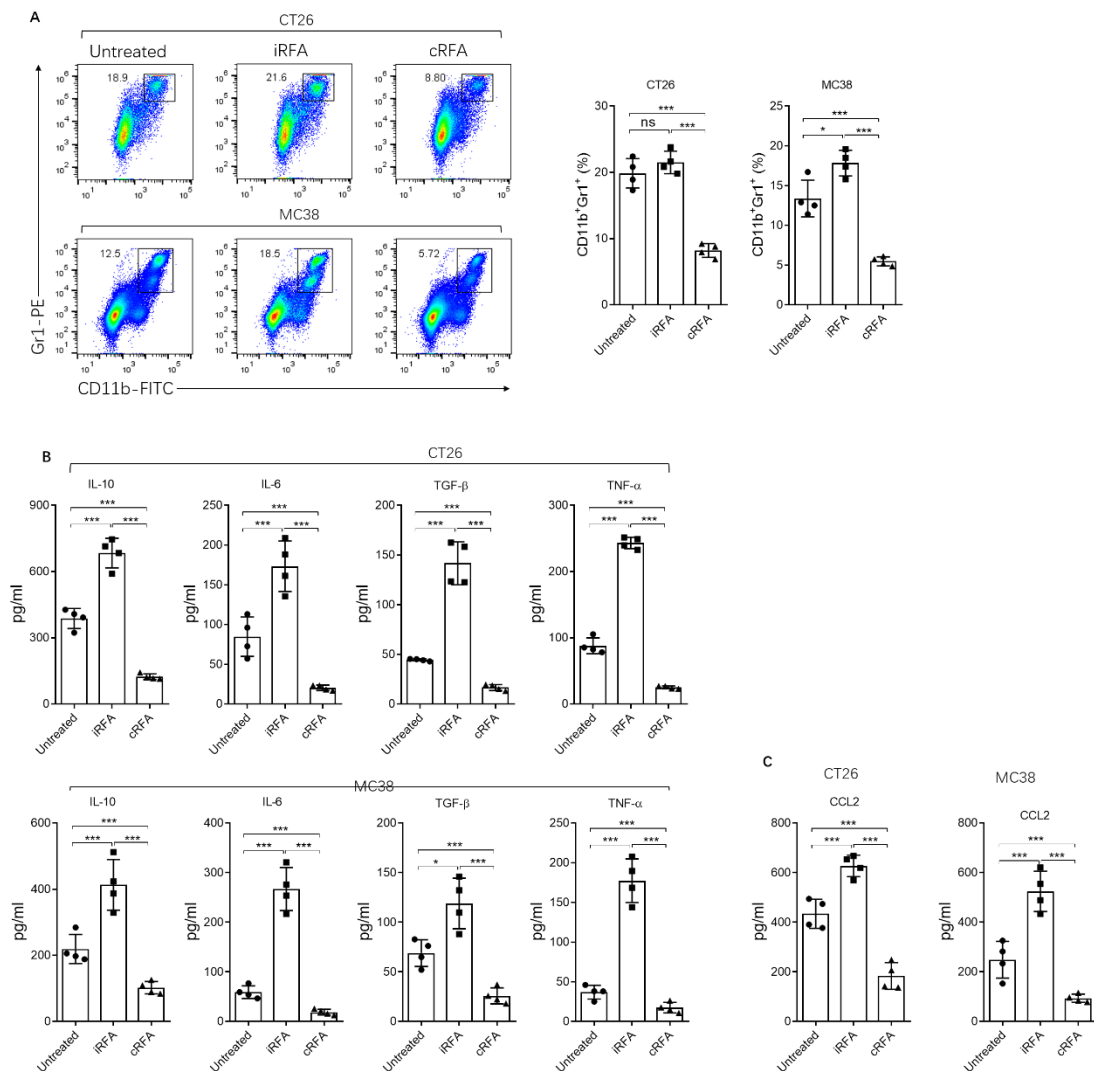

**Supplementary Figure 5.** The changes of peripheral MDSCs and immunosuppressive cytokines and chemokine after cRFA and iRFA. CT26 and MC38-bearing mice as described in Fig. 1A. cRFA or iRFA was performed when the longest dimension reach about 0.8 cm. The venous blood was obtained from the orbit of mice 9 day after treatment. **A.** Flow cytometric analysis and quantification of CD11b<sup>+</sup>Gr1<sup>+</sup> cells (n=4). **B.** Measurements of cytokines IL-10, IL-6, TGFβ and TNFα using ELISA kit (n=4). **C.** Measurement of CCL2 using ELISA kit. Data represent results from 1/2 independent experiments (n=4). The data are represented as mean ± SEM. Statistical differences between pairs of groups were determined by a two-tailed Student's t-test (values represent mean ± SEM, ns presents not significant, \**P* < 0.05, \*\*\**P* < 0.001). Source data are provided as a Source Data file.

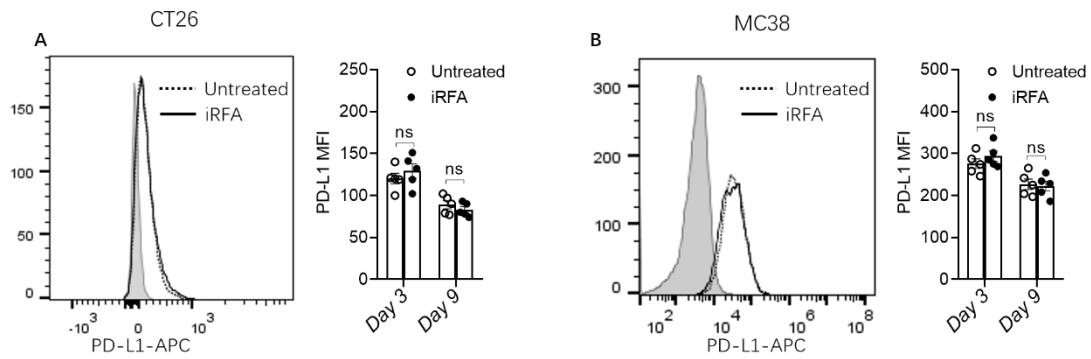

**Supplementary Figure 6.** PD-L1 expression in macrophages infiltrating into the residual tumor after iRFA. iRFA was administrated in CT26 and MC38-bearing mice as described in Fig. 2A. PD-L1 expression on CD11b<sup>+</sup>F4/80<sup>+</sup> cells was analyzed by FCM on day 9 after treatment. Representative histogram and median fluorescence intensity (MFI) were showed. **A.** CT26 model (n=5). **B.** MC38 model. Data represent results from 1/2 independent experiments (n=5). The data are represented as mean  $\pm$  SEM. Statistical differences between pairs of groups were determined by a two-tailed Student's t-test (values represent mean  $\pm$  SEM). Source data are provided as a Source Data file.

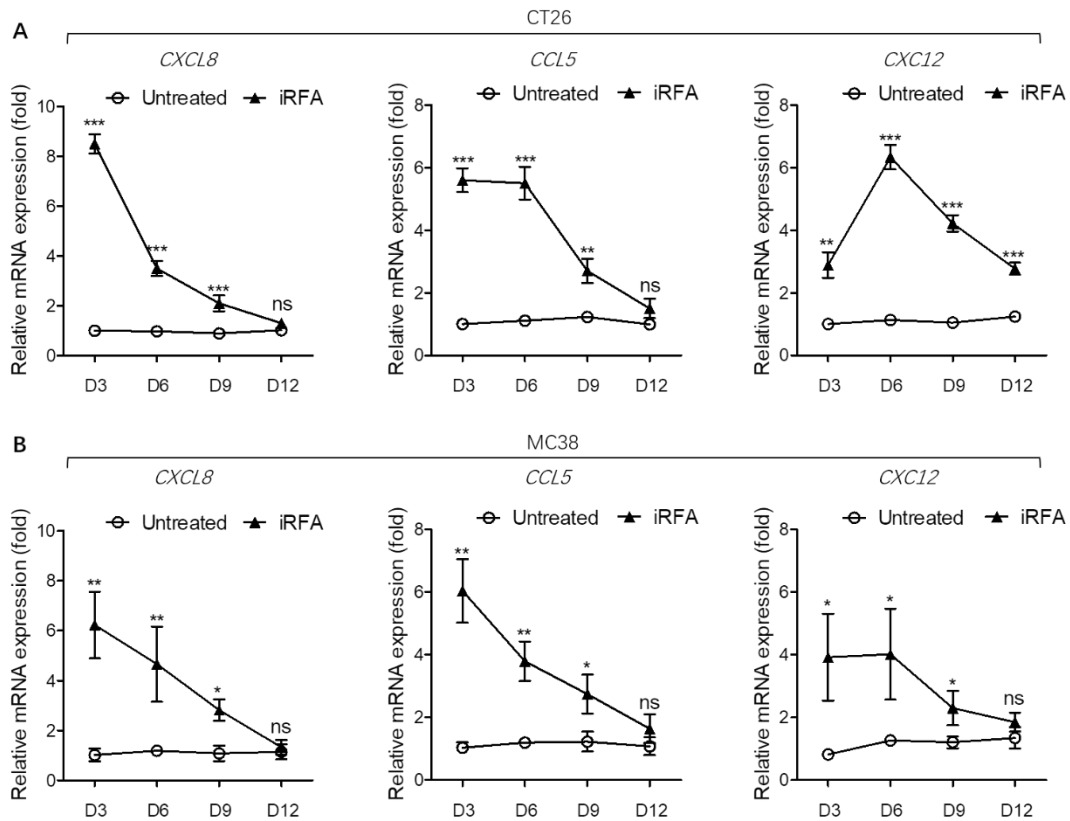

**Supplementary Figure 7.** Altered level of *CXCL8*, *CCL5*, and *CXCL12* mRNA in the residual tumor. iRFA was administrated in CT26 and MC38-bearing mice as described in Fig. 2A. On days 3, 6, 9, and 12 after iRFA treatment, the residual tumors were resected, and total RNA was extracted. *CXCL8*, *CCL5*, and *CXCL12* mRNA expressions were quantified by real-time PCR. Relative mRNA expression was expressed as fold-change. **A.** Data from CT26 model (n=3). **B.** Data from MC38 model. The data are represented as mean  $\pm$  SEM (n=3). Statistical differences between pairs of groups were determined by a two-tailed Student's t-test (values represent mean  $\pm$  SEM, ns presents not significant, \* $P < 0.05$ , \*\* $P < 0.01$ , \*\*\* $P < 0.001$ ). Source data are provided as a Source Data file.

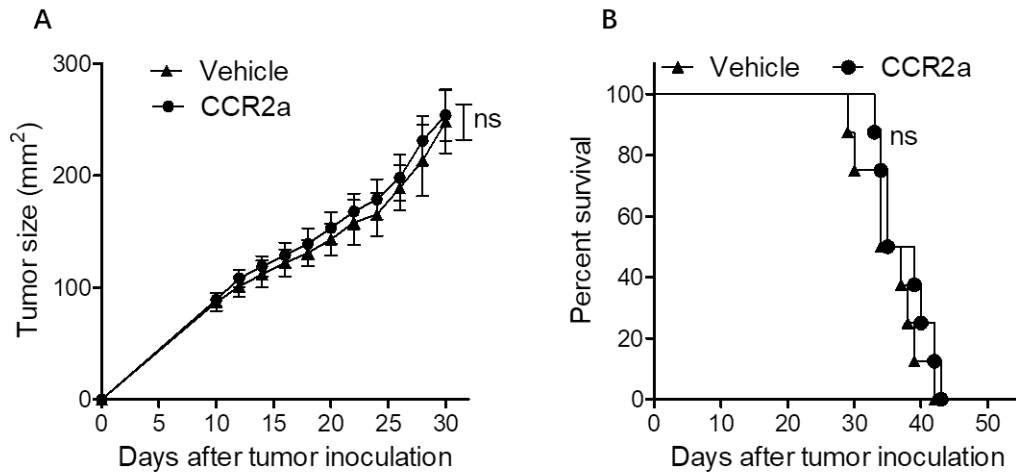

**Supplementary Figure 8.** Treatment with CCR2 antagonist alone has little effect on the inhibition of the growth of intact CT26 tumor. CT26 cells were injected *i.d.* into male Balb/c on the right flank. When the tumors reach the diameter of about 0.5 cm, CCR2 antagonist (CCR2a) was given subcutaneously at a dose of 5 mg/kg twice per day for 9 days. **A.** Growth curve of the implanted tumors (one-sided ANOVA test,  $P=0.162$ ,  $n=8$ ). **B** Kaplan–Meier survival curves are shown, and the log-rank test was performed ( $P=0.293$ ,  $n=8$ ). Source data are provided as a Source Data file.

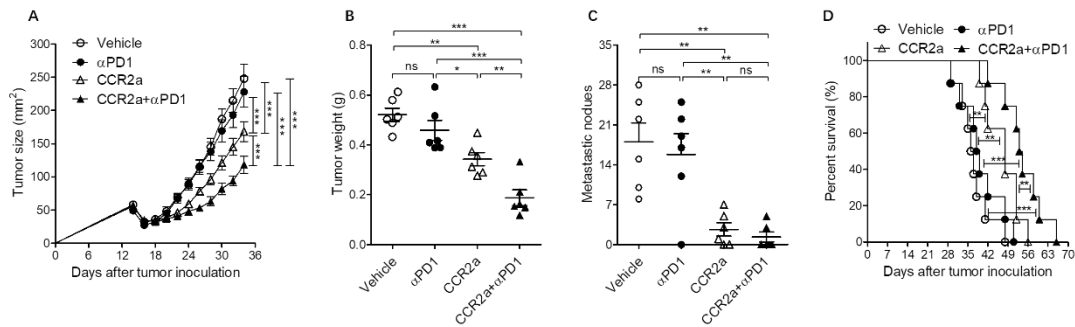

**Supplementary Figure 9.** Treatment with CCR2 antagonist inhibits progression of residual tumor and overcomes resistance to anti-PD-1 therapy in Hepa1-6 mouse model. The Hepa1-6 tumor-bearing mice models were established and treated with iRFA, CCR2 antagonist (CCR2a) and anti-PD-1 as described in Fig 8A. **A** Growth curve of the residual tumor (one-sided ANOVA test, \*\*\* $P < 0.001$ ,  $n = 8$ ). **B** Weight of the residual tumor examined on day 14 after iRFA by dissection the mice ( $n = 6$ ). **C** Number of the metastasis examined on day 14 after iRFA by dissection the mice ( $n = 6$ ). **D** Kaplan-Meier survival curves are shown and the log-rank test was performed ( $n = 8$ ). Data represent results from 1 of 2 independent experiments. The data are represented as mean  $\pm$  SEM. Statistical differences between pairs of groups were determined by a two-tailed Student's t-test (ns present not significant, \* $P < 0.05$ , \*\* $P < 0.01$ , \*\*\* $P < 0.001$ ). Source data are provided as a Source Data file.
